# Supplementary material for: Who Knew? Dopamine Transporter Activity Is Critical in Innate and Adaptive Immune Responses
Source: MDPI journal article supplement (doi:10.3390/cells12020269), 2023-01-10
Supplement: s1 [file s1]

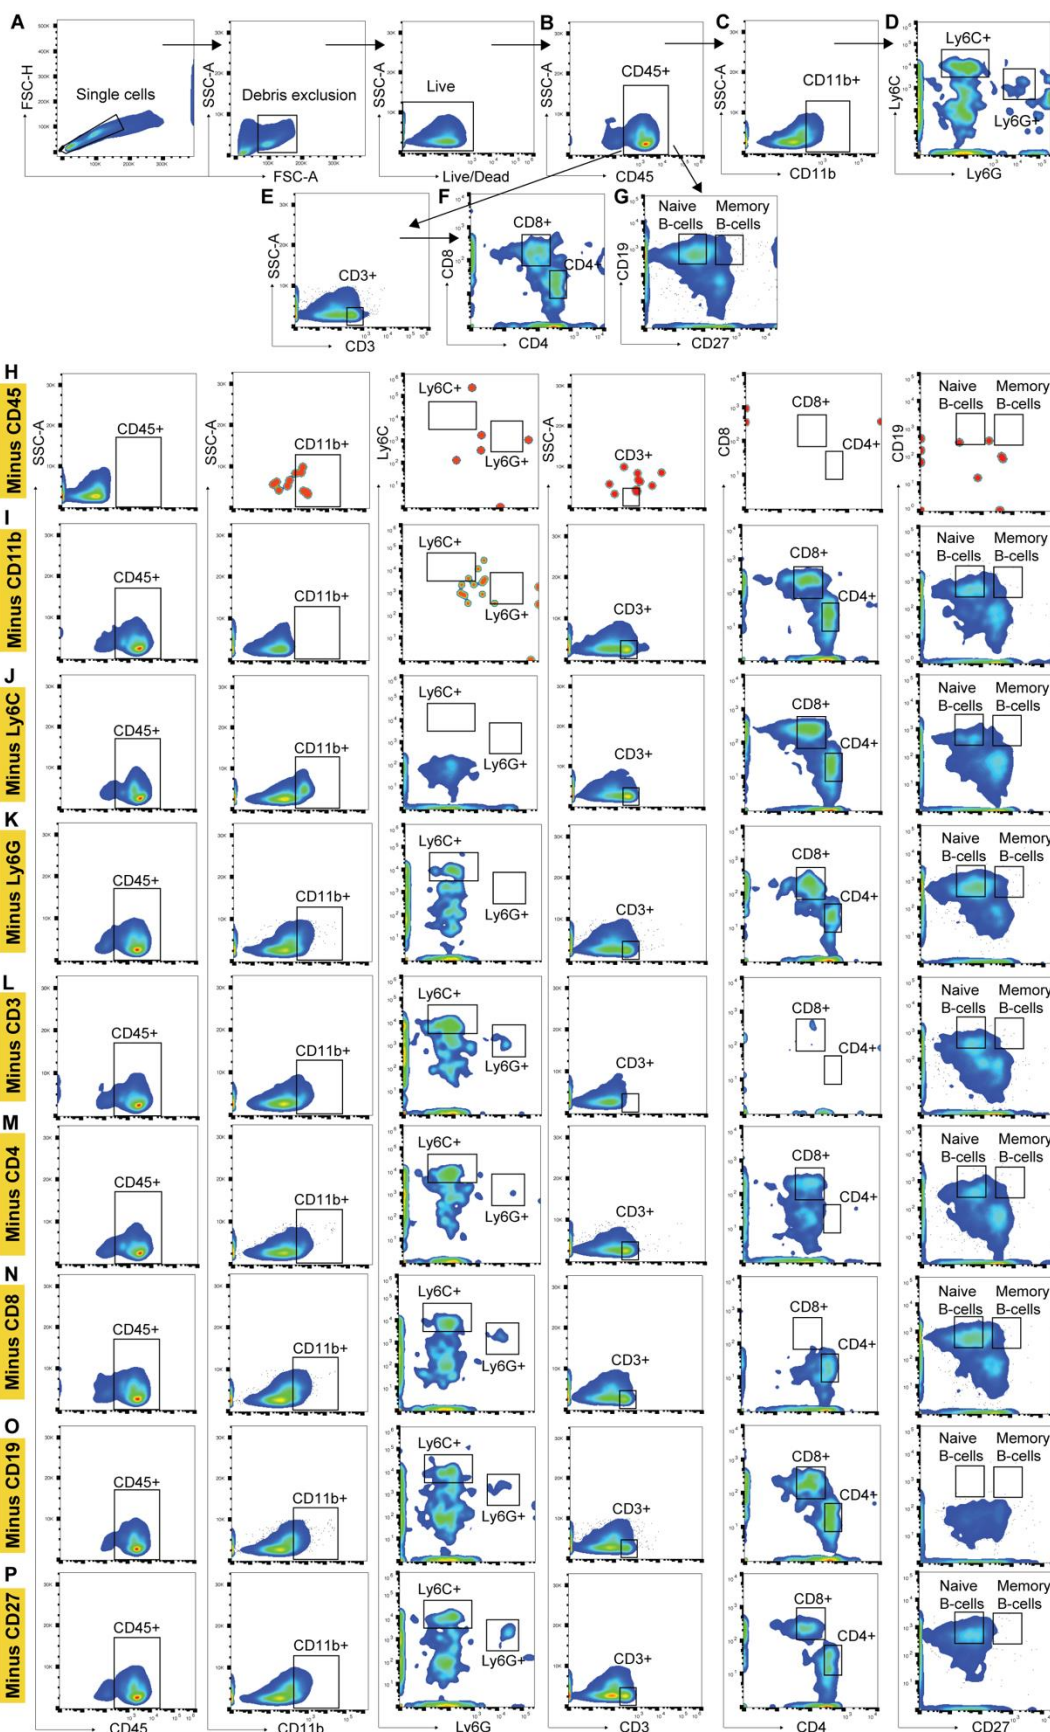

**Supplemental Figure S1. Fluorescence minus one analysis strategy for PBMCs.** A) PBMCs were gated for single cells, debris exclusion and live cells, and thereafter analyzed for expression of B) CD45, C) CD11b, D) Ly6C and Ly6G, E) CD3 T-cells, F) CD4 and CD8 T-cells, and G) Naïve and Memory B-cells. Gates were set by fluorescence minus one (FMO) analysis, as shown in H-P, Gating strategy was established by FMO analysis, in which each condition omitted one marker to establish correct gate placement.

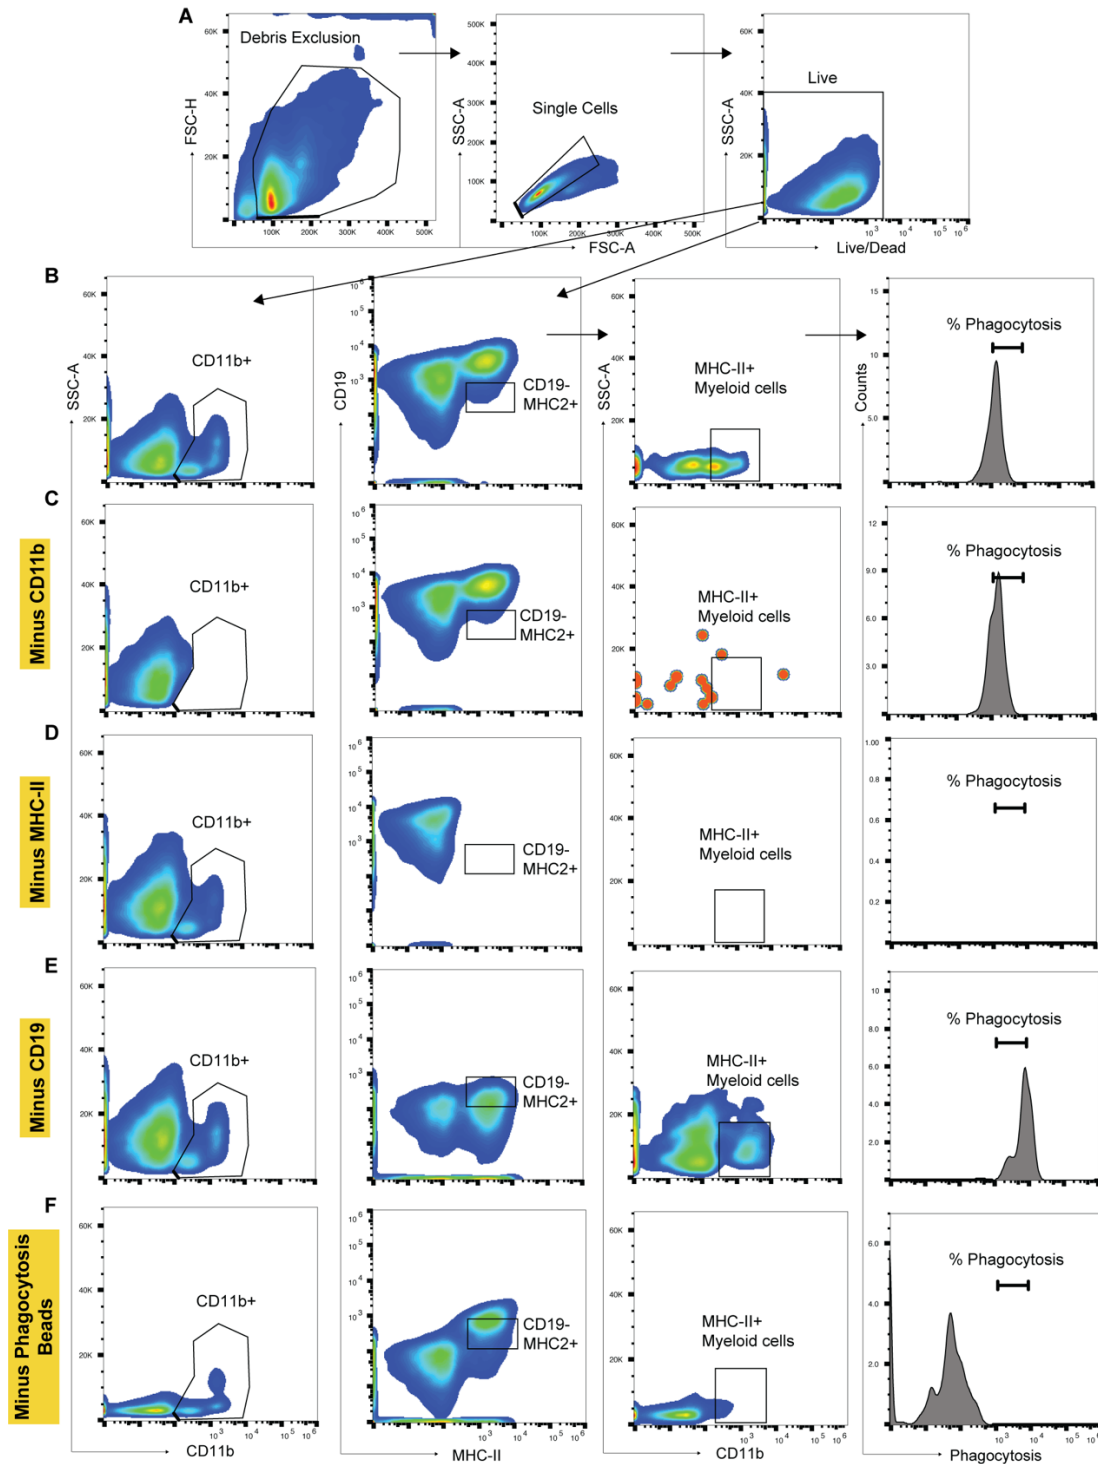

**Supplemental Figure S2. Fluorescence minus one analysis strategy for splenocyte analysis.** Splenocytes were A) gated for debris exclusion, and single, live cells, and then B) assessed for expression of CD11b, populations of MHC-II+ myeloid cells, and phagocytosis. Gating strategy was established by FMO analysis, in which each condition C-F omitted one marker to establish correct gate placement.

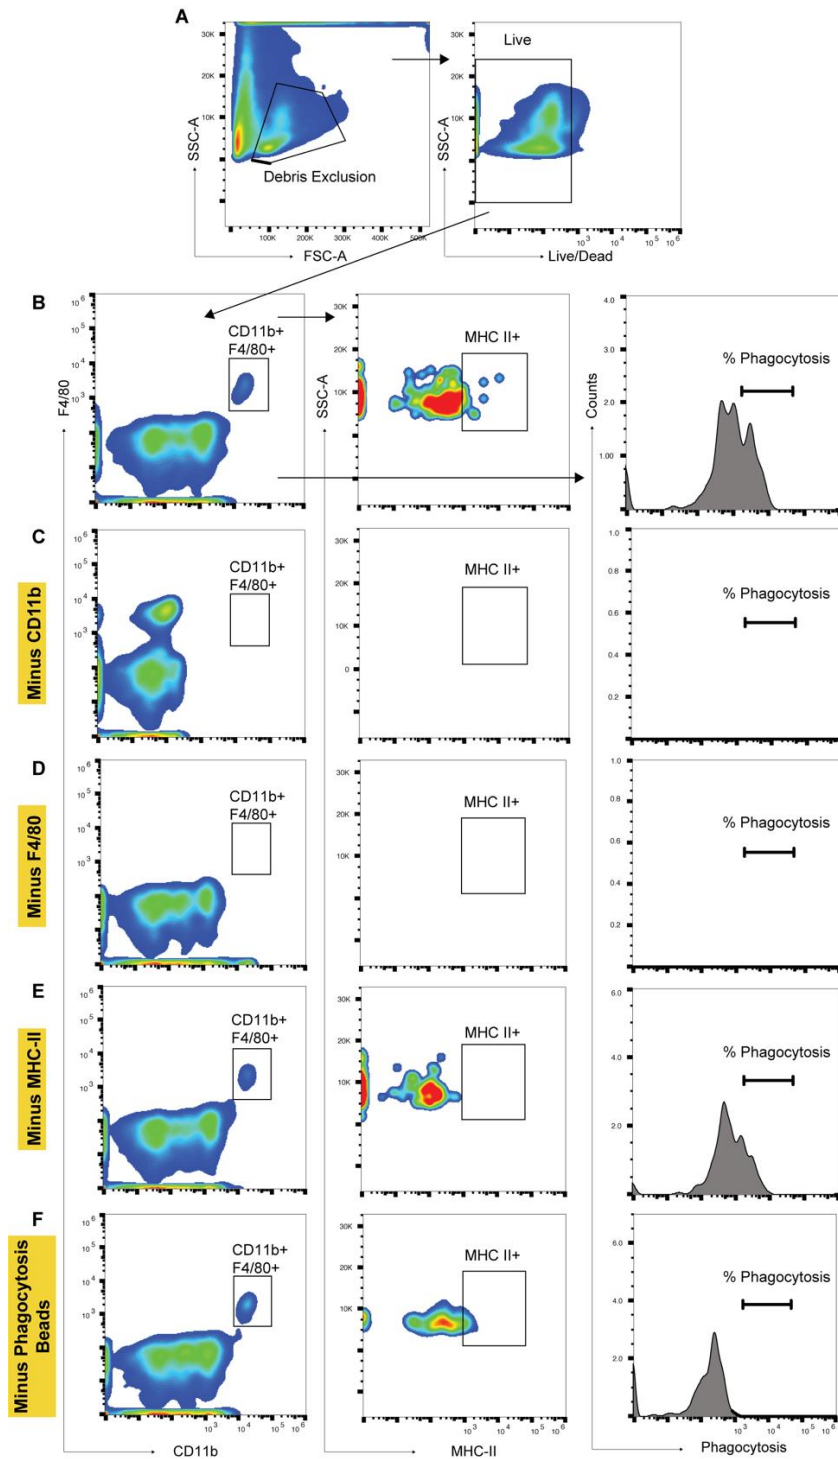

**Supplemental Figure S3. Fluorescence minus one analysis strategy for analysis of peritoneal macrophages.** A) peritoneal macrophages were analyzed by gating single, live cells and excluding debris,

then assessing these cells for B) expression of CD11b, F4/80, and then assessing those cells for expression of MHC-II and phagocytosis. Gating strategy was established by FMO analysis, in which each condition C-F omitted one marker to establish correct gate placement.
